# Supplementary material
Source: MDPI journal article supplement (https://www.mdpi.com/2073-4441/15/6/1142)
Supplement: s1 [file s1]

**Table S1:** Mutant Stable residue and their energy

| Residue | Mutation | Mutation Energy | Effect of Mutation |
|---------|----------|-----------------|--------------------|
| Arg82   | CYS      | -0.82           | Stabilizing        |
|         | ILE      | -0.79           | Stabilizing        |
|         | TRP      | -0.73           | Stabilizing        |
|         | LEU      | -0.71           | Stabilizing        |
|         | PRO      | -0.58           | Stabilizing        |
|         | GLN      | 0.26            | Neutral            |
|         | GLY      | 0.37            | Neutral            |
|         | ALA      | 0.39            | Neutral            |
|         | ASP      | 0.72            | Destabilizing      |
|         | HSC      | 0.76            | Destabilizing      |
| Ile123  | LEU      | -0.28           | Neutral            |
|         | TRP      | -0.13           | Neutral            |
|         | ILE      | 0.02            | Neutral            |
|         | CYS      | 0.04            | Neutral            |
|         | PHE      | 0.06            | Neutral            |
|         | LYS      | 1.19            | Destabilizing      |
|         | HSC      | 1.55            | Destabilizing      |
|         | ARG      | 1.63            | Destabilizing      |
|         | GLY      | 2.21            | Destabilizing      |
|         | PRO      | 2.52            | Destabilizing      |
| Gln126  | TRP      | -1.59           | Stabilizing        |
|         | TYR      | -0.61           | Stabilizing        |
|         | ILE      | -0.42           | Neutral            |
|         | LEU      | -0.4            | Neutral            |
|         | PHE      | -0.37           | Neutral            |
|         | SER      | 1.16            | Destabilizing      |
|         | ALA      | 1.4             | Destabilizing      |
|         | ASP      | 1.71            | Destabilizing      |
|         | GLY      | 2.54            | Destabilizing      |
|         | PRO      | 6.67            | Destabilizing      |
| Glu144  | TRP      | -1.93           | Stabilizing        |
|         | ILE      | -0.32           | Neutral            |
|         | GLU      | -0.03           | Neutral            |
|         | LYS      | 0.09            | Neutral            |
|         | CYS      | 0.1             | Neutral            |
|         | ALA      | 1.16            | Destabilizing      |
|         | TYR      | 1.24            | Destabilizing      |
|         | ASPH     | 1.65            | Destabilizing      |
|         | HSC      | 2.09            | Destabilizing      |
|         | GLY      | 2.16            | Destabilizing      |
